# Supplementary material for: Data-Independent Acquisition (DIA) Is Superior for High Precision Phospho-Peptide Quantification in Magnaporthe oryzae
Source: MDPI journal article supplement (doi:10.3390/jof9010063), 2022-12-31
Supplement: s1 [file s1]

**Table S1:** Variable window sizes for DIA acquisition with Orbitrap Exploris 480.

| Window | center (m/z) | Isolation Window (m/z) | m/z start | m/z end |
|--------|--------------|------------------------|-----------|---------|
| 1      | 392.58       | 95.2                   | 344.98    | 440.18  |
| 2      | 459.56       | 39.8                   | 439.66    | 479.46  |
| 3      | 494.25       | 30.6                   | 478.95    | 509.55  |
| 4      | 522.78       | 27.5                   | 509.03    | 536.53  |
| 5      | 548.53       | 25                     | 536.03    | 561.03  |
| 6      | 572.89       | 24.7                   | 560.54    | 585.24  |
| 7      | 596.9        | 24.3                   | 584.75    | 609.05  |
| 8      | 620.81       | 24.5                   | 608.56    | 633.06  |
| 9      | 645.09       | 25.1                   | 632.54    | 657.64  |
| 10     | 670.1        | 26                     | 657.1     | 683.1   |
| 11     | 696.1        | 27                     | 682.6     | 709.6   |
| 12     | 723.35       | 28.5                   | 709.1     | 737.6   |
| 13     | 752.37       | 30.6                   | 737.07    | 767.67  |
| 14     | 783.12       | 31.9                   | 767.17    | 799.07  |
| 15     | 816.29       | 35.4                   | 798.59    | 833.99  |
| 16     | 852.84       | 38.7                   | 833.49    | 872.19  |
| 17     | 893.43       | 43.5                   | 871.68    | 915.18  |
| 18     | 939.95       | 50.6                   | 914.65    | 965.25  |
| 19     | 997.57       | 65.7                   | 964.72    | 1030.42 |
| 20     | 1070.86      | 81.9                   | 1029.91   | 1111.81 |
| 21     | 1180.66      | 138.7                  | 1111.31   | 1250.01 |
